# Supplementary material for: Bone structure and function in male C57BL/6 mice: Effects of a high-fat Western-style diet with or without trace minerals
Source: PubMed Central journal article supplement — Bone Rep. 2016 May 13;5:141–9. doi: 10.1016/j.bonr.2016.05.002 (PMC4920365; doi:10.1016/j.bonr.2016.05.002), 2016-05-13
Supplement: NIHMS793176-supplement-2.pdf [file NIHMS793176-supplement-2.pdf]

**Supplement Table 1.** Composition of the multi-mineral algae product (Aquamin Soluble®).

| Element    | µg/g    | Element      | µg/g   | Element   | µg/g  |
|------------|---------|--------------|--------|-----------|-------|
| Aluminum   | 32.7    | Hafnium      | 0.025  | Rubidium  | 0.350 |
| Antimony   | 0.086   | Holmium      | <0.03  | Ruthenium | 0.058 |
| Arsenic    | 0.115   | Indium       | 0.021  | Samarium  | 0.083 |
| Barium     | 1.43    | Iodine       | 14.0   | Scandium  | 0.075 |
| Beryllium  | 0.062   | Iridium      | <0.01  | Selenium  | 3.70  |
| Bismuth    | 0.050   | Iron         | 162    | Silicon   | 95.8  |
| Boron      | 15.6    | Lanthanum    | 0.085  | Silver    | 0.098 |
| Bromine    | 8.35    | Lead         | 0.131  | Sodium    | 2,340 |
| Cadmium    | 0.045   | Lithium      | 0.693  | Strontium | 644   |
| Calcium    | 152,900 | Lutetium     | 0.011  | Sulfur    | 1,953 |
| Carbon     | 659,100 | Magnesium    | 15,200 | Tantalum  | 0.083 |
| Cerium     | 0.029   | Manganese    | 34.8   | Tellurium | 0.048 |
| Cesium     | 0.011   | Mercury      | <0.005 | Terbium   | 0.050 |
| Chloride   | 1,210   | Molybdenum   | 0.082  | Thallium  | 0.096 |
| Chromium   | 0.820   | Neodymium    | 0.033  | Thorium   | <0.02 |
| Cobalt     | <0.05   | Nickel       | 0.115  | Thulium   | 0.017 |
| Copper     | 1.09    | Niobium      | <0.03  | Tin       | 0.063 |
| Dysprosium | 0.048   | Osmium       | <0.01  | Titanium  | 8.19  |
| Erbium     | 0.339   | Palladium    | <0.01  | Tungsten  | 0.048 |
| Europium   | 0.071   | Phosphorous  | 320    | Vanadium  | 4.29  |
| Fluoride   | 6.95    | Platinum     | <0.01  | Ytterbium | 0.094 |
| Gadolinium | 0.042   | Potassium    | 119    | Yttrium   | 0.445 |
| Gallium    | 0.115   | Praseodymium | 0.151  | Zinc      | 10.7  |
| Germanium  | 0.028   | Rhenium      | <0.02  | Zirconium | 0.28  |
| Gold       | <0.01   | Rhodium      | <0.01  |           |       |

Source: 2008 Test Certificate for Aquamin Soluble®, by Advanced Laboratories, Inc. (Salt Lake City, UT), for client Marigot Limited (Ireland).
