# Supplementary material for: Bone structure and function in male C57BL/6 mice: Effects of a high-fat Western-style diet with or without trace minerals
Source: PubMed Central journal article supplement — Bone Rep. 2016 May 13;5:141–9. doi: 10.1016/j.bonr.2016.05.002 (PMC4920365; doi:10.1016/j.bonr.2016.05.002), 2016-05-13
Supplement: NIHMS793176-supplement-3.pdf [file NIHMS793176-supplement-3.pdf]

**Supplement Table 2. Composition of the four diets**

|              | AIN76A |       | AIN76A+Aquamin |       | HFWD |       | HFWD+Aquamin |       |
|--------------|--------|-------|----------------|-------|------|-------|--------------|-------|
|              | gm%    | kcal% | gm%            | kcal% | gm%  | kcal% | gm%          | kcal% |
| Protein      | 20.3   | 20.8  | 19.1           | 20.8  | 24.4 | 20.5  | 22.9         | 20.5  |
| Carbohydrate | 66     | 67.7  | 66             | 67.7  | 48.5 | 41.8  | 45.7         | 41.8  |
| Fat          | 5      | 11.5  | 5              | 11.5  | 20   | 37.8  | 18.8         | 37.8  |
| Total        | 91.3   | 100   | 86             | 100   | 92.9 | 100   | 87.5         | 100   |
| kcal/gm      | 3.90   |       | 3.67           |       | 4.76 |       | 4.49         |       |

  

| INGREDIENTS                                          | gm          | kcal        | gm          | kcal        | gm          | kcal        | gm          | kcal        |
|------------------------------------------------------|-------------|-------------|-------------|-------------|-------------|-------------|-------------|-------------|
| Casein <sup>a</sup>                                  | 200         | 800         | 200         | 800         | 240         | 960         | 240         | 960         |
| DL-Methionine                                        | 3           | 12          | 3           | 12          | 0           | 0           | 0           | 0           |
| L-Cystine                                            | 0           | 0           | 0           | 0           | 3.6         | 14          | 3.6         | 14          |
| Corn starch                                          | 150         | 600         | 150         | 600         | 100         | 400         | 100         | 400         |
| Maltodextrin 10                                      | 0           | 0           | 0           | 0           | 75          | 300         | 75          | 300         |
| Sucrose                                              | 500         | 2000        | 500         | 2000        | 310         | 1242        | 310         | 1242        |
| Cellulose (BW200)                                    | 50          | 0           | 50          | 0           | 20          | 0           | 20          | 0           |
| Corn oil                                             | 50          | 450         | 50          | 450         | 200         | 1800        | 200         | 1800        |
| Ethoxyquin                                           | 0.01        | 0           | 0.01        | 0           | 0.01        | 0           | 0.01        | 0           |
| Mineral Mix for AIN76A <sup>b</sup>                  | 35          | 0           | 35          | 0           | 0           | 0           | 0           | 0           |
| Mineral Mix (without Calcium Phosphate) <sup>c</sup> | 0           | 0           | 0           | 0           | 21          | 0           | 21          | 0           |
| Monosodium phosphate                                 | 0           | 0           | 0           | 0           | 7.98        | 0           | 7.98        | 0           |
| Monopotassium phosphate                              | 0           | 0           | 0           | 0           | 7.91        | 0           | 7.91        | 0           |
| Calcium carbonate                                    | 0           | 0           | 0           | 0           | 0.88        | 0           | 0.88        | 0           |
| Aquamin <sup>®</sup> Soluble (Supplement Table 1)    | 0           | 0           | 62          | 0           | 0           | 0           | 62          | 0           |
| Vitamin Mix for AIN76A                               | 10          | 40          | 10          | 40          | 0           | 0           | 0           | 0           |
| Vitamin Mix (without Vit. D3 or Folic Acid)          | 0           | 0           | 0           | 0           | 12          | 48          | 12          | 48          |
| Choline bitartrate                                   | 2           | 0           | 2           | 0           | 1.2         | 0           | 1.2         | 0           |
| Folic acid                                           | 0           | 0           | 0           | 0           | 0.00023     | 0           | 0.00023     | 0           |
| Vitamin D3 (100,000 IU/g)                            | 0           | 0           | 0           | 0           | 0.0012      | 0           | 0.0012      | 0           |
| <b>TOTAL</b>                                         | <b>1000</b> | <b>3902</b> | <b>1062</b> | <b>3902</b> | <b>1000</b> | <b>4764</b> | <b>1062</b> | <b>4764</b> |

<sup>a</sup>Amount of essential minerals in Casein added to all diets (amount per 100 gm of Casein): calcium (25 mg), magnesium (2 mg), copper (0.01 mg), Iron (0.4 mg), manganese (0.014 mg), potassium (2.5 mg), selenium (0.03 mg), sodium (5.2 mg), zinc (4.2mg).

<sup>b</sup>Amount of essential minerals in mineral mix for low fat diets with/without mineral supplement (used at 35 gm/kg diet): calcium (5.2 gm), magnesium (0.5 gm), chromium (2 mg), copper (6 mg), Iron (45 mg), manganese (59 mg), potassium (3.6 g ), selenium (0.16 mg), sodium (1.0 gm), zinc (29 mg).

<sup>c</sup>Amount of essential minerals in mineral mix for western-style diets with/without mineral supplement (used at 21 gm/kg): magnesium (0.6 gm), chromium (2.4 mg), copper (7.2 mg), Iron (54 mg), manganese (71 mg), potassium (4.3 g ), selenium (0.19 mg), sodium (1.2 gm), zinc (35 mg).

*Diets were formulated by Research Diets Incorporated (New Brunswick, NJ).*
