# Supplementary material for: Bone structure and function in male C57BL/6 mice: Effects of a high-fat Western-style diet with or without trace minerals
Source: PubMed Central journal article supplement — Bone Rep. 2016 May 13;5:141–9. doi: 10.1016/j.bonr.2016.05.002 (PMC4920365; doi:10.1016/j.bonr.2016.05.002), 2016-05-13
Supplement: NIHMS793176-supplement-4.pdf [file NIHMS793176-supplement-4.pdf]

**Supplement Table 3.** Micro-CT analysis of trabecular regions of femora.

|                                                             | AIN76A                   | AIN76A+AQ                  | HFWD          | HFWD+AQ                       |
|-------------------------------------------------------------|--------------------------|----------------------------|---------------|-------------------------------|
| <b>5 Months</b>                                             |                          |                            |               |                               |
| Bone mineral content (mg)                                   | 0.75 ± 0.06              | 0.89 ± 0.20                | 0.75 ± 0.24   | 0.81 ± 0.07                   |
| Bone mineral density (mg/cc)                                | 210 ± 16 <sup>c</sup>    | 238 ± 45                   | 183 ± 31      | 222 ± 17 <sup>a</sup>         |
| Tissue mineral density (mg/cc)                              | 571 ± 18 <sup>c</sup>    | 579 ± 19                   | 523 ± 12      | 565 ± 9 <sup>a</sup>          |
| Bone volume fraction (mm <sup>3</sup> /mm <sup>3</sup> )    | 0.12 ± 0.02              | 0.16 ± 0.07                | 0.11 ± 0.07   | 0.13 ± 0.02                   |
| Surface to volume ratio (mm <sup>2</sup> /mm <sup>3</sup> ) | 53.5 ± 3.5               | 49.8 ± 4.0 <sup>d</sup>    | 56.8 ± 5.7    | 49.7 ± 2.4 <sup>a, b</sup>    |
| Trabecular thickness (mm)                                   | 0.038 ± 0.002            | 0.040 ± 0.004              | 0.036 ± 0.004 | 0.040 ± 0.002 <sup>a, b</sup> |
| Trabecular number (1/mm)                                    | 3.13 ± 0.35 <sup>c</sup> | 3.90 ± 1.24                | 2.47 ± 0.46   | 3.32 ± 0.42 <sup>a</sup>      |
| Trabecular spacing (mm)                                     | 0.29 ± 0.04              | 0.24 ± 0.10                | 0.35 ± 0.11   | 0.27 ± 0.04 <sup>a</sup>      |
| <b>12 Months</b>                                            |                          |                            |               |                               |
| Bone mineral content (mg)                                   | 0.73 ± 0.11 <sup>c</sup> | 0.76 ± 0.09                | 0.59 ± 0.16   | 0.73 ± 0.08 <sup>a</sup>      |
| Bone mineral density (mg/cc)                                | 202 ± 26 <sup>c</sup>    | 209 ± 23                   | 156 ± 39      | 194 ± 19 <sup>a</sup>         |
| Tissue mineral density (mg/cc)                              | 534 ± 34                 | 573 ± 23                   | 561 ± 64      | 557 ± 21                      |
| Bone volume fraction (mm <sup>3</sup> /mm <sup>3</sup> )    | 0.08 ± 0.03              | 0.11 ± 0.03                | 0.06 ± 0.05   | 0.09 ± 0.02                   |
| Surface to volume ratio (mm <sup>2</sup> /mm <sup>3</sup> ) | 57.0 ± 4.2               | 47.6 ± 3.4 <sup>d</sup>    | 56.5 ± 12.3   | 50.9 ± 3.6 <sup>b</sup>       |
| Trabecular thickness (mm)                                   | 0.035 ± 0.003            | 0.042 ± 0.003 <sup>d</sup> | 0.034 ± 0.003 | 0.039 ± 0.003 <sup>a, b</sup> |
| Trabecular number (1/mm)                                    | 2.37 ± 0.70 <sup>c</sup> | 2.60 ± 0.66                | 1.50 ± 0.45   | 2.24 ± 0.37 <sup>a</sup>      |
| Trabecular spacing (mm)                                     | 0.42 ± 0.12 <sup>c</sup> | 0.37 ± 0.14                | 0.69 ± 0.25   | 0.42 ± 0.09 <sup>a</sup>      |
| <b>18 Months</b>                                            |                          |                            |               |                               |
| Bone mineral content (mg)                                   | 0.65 ± 0.07 <sup>c</sup> | 0.74 ± 0.16                | 0.43 ± 0.07   | 0.62 ± 0.14 <sup>a</sup>      |
| Bone mineral density (mg/cc)                                | 180 ± 20 <sup>c</sup>    | 205 ± 45                   | 112 ± 23      | 136 ± 30 <sup>a</sup>         |
| Tissue mineral density (mg/cc)                              | 531 ± 44                 | 595 ± 48 <sup>d</sup>      | 557 ± 22      | 616 ± 39 <sup>a, b</sup>      |
| Bone volume fraction (mm <sup>3</sup> /mm <sup>3</sup> )    | 0.07 ± 0.02 <sup>c</sup> | 0.11 ± 0.06 <sup>d</sup>   | 0.03 ± 0.01   | 0.06 ± 0.03 <sup>a</sup>      |
| Surface to volume ratio (mm <sup>2</sup> /mm <sup>3</sup> ) | 60.2 ± 6.3               | 48.2 ± 6.1 <sup>d</sup>    | 63.4 ± 6.4    | 50.6 ± 7.5 <sup>a, b</sup>    |
| Trabecular thickness (mm)                                   | 0.034 ± 0.004            | 0.042 ± 0.005 <sup>d</sup> | 0.032 ± 0.003 | 0.040 ± 0.006 <sup>a, b</sup> |
| Trabecular number (1/mm)                                    | 2.05 ± 0.56 <sup>c</sup> | 2.67 ± 1.30                | 0.83 ± 0.18   | 1.34 ± 0.55 <sup>a, b</sup>   |
| Trabecular spacing (mm)                                     | 0.49 ± 0.13 <sup>c</sup> | 0.44 ± 0.30                | 1.24 ± 0.31   | 0.81 ± 0.31 <sup>a, b</sup>   |

Each femur was subjected to micro-CT at trabecular ROI—distal metaphysis. With each bone, eight trabecular parameters were assessed. Values are means and standard deviation. Statistical significance was determined by ANOVA followed by paired group comparisons ( $p < 0.05$ ). “a” and “b” are placed on the HFWD+AQ ; group: “a” shows statistically significant difference relative to the HFWD group, “b” shows statistically significant difference relative to AIN76A; “c” is placed on the AIN76A shows significant difference relative to the HFWD and “d” is placed on the AIN76A+AQ shows significant difference relative to AIN76A. Data are based on 10 male mice in each diet group at 5 and 12 months while 15 mice at 18 months.
