# Supplementary material for: Bone structure and function in male C57BL/6 mice: Effects of a high-fat Western-style diet with or without trace minerals
Source: PubMed Central journal article supplement — Bone Rep. 2016 May 13;5:141–9. doi: 10.1016/j.bonr.2016.05.002 (PMC4920365; doi:10.1016/j.bonr.2016.05.002), 2016-05-13
Supplement: NIHMS793176-supplement-5.pdf [file NIHMS793176-supplement-5.pdf]

**Supplement Table 4. Micro-CT analysis of cortical regions of femora.**

|                                            | AIN76A                     | AIN76A+AQ                  | HFWD          | HFWD+AQ                     |
|--------------------------------------------|----------------------------|----------------------------|---------------|-----------------------------|
| <b>5 Months</b>                            |                            |                            |               |                             |
| Bone mineral content (mg)                  | 3.5 ± 0.2 <sup>c</sup>     | 3.7 ± 0.3                  | 3.1 ± 0.2     | 3.7 ± 0.2 <sup>a, b</sup>   |
| Bone mineral density (mg/cc)               | 295 ± 24                   | 302 ± 23                   | 276 ± 19      | 300 ± 24                    |
| Tissue mineral density (mg/cc)             | 1086 ± 25 <sup>c</sup>     | 1083 ± 25                  | 1009 ± 21     | 1073 ± 13 <sup>a</sup>      |
| Mean thickness (mm)                        | 0.190 ± 0.007 <sup>c</sup> | 0.193 ± 0.005              | 0.173 ± 0.009 | 0.193 ± 0.005 <sup>a</sup>  |
| Polar moment of inertia (mm <sup>4</sup> ) | 0.112 ± 0.010              | 0.132 ± 0.018 <sup>d</sup> | 0.116 ± 0.015 | 0.125 ± 0.010 <sup>b</sup>  |
| Endosteal perimeter (mm)                   | 4.0 ± 0.2                  | 4.1 ± 0.2                  | 3.9 ± 0.1     | 4.2 ± 0.2 <sup>a, b</sup>   |
| Periosteal perimeter (mm)                  | 5.3 ± 0.3                  | 5.4 ± 0.3                  | 5.3 ± 0.3     | 5.6 ± 0.3                   |
| Marrow area (mm <sup>2</sup> )             | 0.98 ± 0.05                | 1.11 ± 0.07 <sup>d</sup>   | 1.02 ± 0.05   | 1.07 ± 0.07 <sup>b</sup>    |
| Cross sectional area (mm <sup>2</sup> )    | 0.77 ± 0.03 <sup>c</sup>   | 0.82 ± 0.04 <sup>d</sup>   | 0.71 ± 0.04   | 0.81 ± 0.03 <sup>a, b</sup> |
| Total area (mm <sup>2</sup> )              | 1.75 ± 0.07                | 1.93 ± 0.10 <sup>d</sup>   | 1.73 ± 0.06   | 1.88 ± 0.09 <sup>a, b</sup> |
| <b>12 Months</b>                           |                            |                            |               |                             |
| Bone mineral content (mg)                  | 4.2 ± 0.4 <sup>c</sup>     | 4.1 ± 0.2                  | 3.7 ± 0.3     | 4.2 ± 0.3 <sup>a</sup>      |
| Bone mineral density (mg/cc)               | 292 ± 24 <sup>c</sup>      | 270 ± 25                   | 247 ± 30      | 282 ± 18 <sup>a</sup>       |
| Tissue mineral density (mg/cc)             | 1063 ± 30 <sup>c</sup>     | 1086 ± 17 <sup>d</sup>     | 1034 ± 16     | 1074 ± 24 <sup>a</sup>      |
| Mean thickness (mm)                        | 0.199 ± 0.012 <sup>c</sup> | 0.198 ± 0.006              | 0.168 ± 0.011 | 0.193 ± 0.014 <sup>a</sup>  |
| Polar moment of inertia (mm <sup>4</sup> ) | 0.145 ± 0.015              | 0.152 ± 0.013              | 0.160 ± 0.021 | 0.163 ± 0.020               |
| Endosteal perimeter (mm)                   | 4.2 ± 0.2                  | 4.2 ± 0.1                  | 4.4 ± 0.3     | 4.5 ± 0.2 <sup>b</sup>      |
| Periosteal perimeter (mm)                  | 5.5 ± 0.2 <sup>c</sup>     | 5.5 ± 0.2                  | 5.9 ± 0.4     | 5.8 ± 0.3                   |
| Marrow area (mm <sup>2</sup> )             | 1.13 ± 0.07 <sup>c</sup>   | 1.17 ± 0.04                | 1.25 ± 0.13   | 1.28 ± 0.10 <sup>b</sup>    |
| Cross sectional area (mm <sup>2</sup> )    | 0.86 ± 0.07 <sup>c</sup>   | 0.87 ± 0.04                | 0.76 ± 0.05   | 0.88 ± 0.07 <sup>a</sup>    |
| Total area (mm <sup>2</sup> )              | 1.99 ± 0.12                | 2.04 ± 0.08                | 2.01 ± 0.14   | 2.15 ± 0.12 <sup>a, b</sup> |
| <b>18 Months</b>                           |                            |                            |               |                             |
| Bone mineral content (mg)                  | 4.2 ± 0.4 <sup>c</sup>     | 4.2 ± 0.4                  | 3.5 ± 0.5     | 4.2 ± 0.4 <sup>a</sup>      |
| Bone mineral density (mg/cc)               | 305 ± 39 <sup>c</sup>      | 301 ± 28                   | 257 ± 31      | 292 ± 23 <sup>a</sup>       |
| Tissue mineral density (mg/cc)             | 1081 ± 16 <sup>c</sup>     | 1112 ± 14 <sup>d</sup>     | 1042 ± 33     | 1118 ± 24 <sup>a, b</sup>   |
| Mean thickness (mm)                        | 0.186 ± 0.012 <sup>c</sup> | 0.189 ± 0.015              | 0.146 ± 0.021 | 0.181 ± 0.012 <sup>a</sup>  |
| Polar moment of inertia (mm <sup>4</sup> ) | 0.155 ± 0.014              | 0.170 ± 0.020              | 0.168 ± 0.021 | 0.175 ± 0.033               |
| Endosteal perimeter (mm)                   | 4.6 ± 0.2 <sup>c</sup>     | 4.5 ± 0.2 <sup>d</sup>     | 4.9 ± 0.2     | 4.6 ± 0.2 <sup>a</sup>      |
| Periosteal perimeter (mm)                  | 5.9 ± 0.3                  | 5.7 ± 0.2 <sup>d</sup>     | 6.0 ± 0.3     | 5.8 ± 0.3 <sup>a</sup>      |
| Marrow area (mm <sup>2</sup> )             | 1.26 ± 0.07 <sup>c</sup>   | 1.33 ± 0.06 <sup>d</sup>   | 1.58 ± 0.12   | 1.46 ± 0.09 <sup>a, b</sup> |
| Cross sectional area (mm <sup>2</sup> )    | 0.84 ± 0.05 <sup>c</sup>   | 0.87 ± 0.07                | 0.72 ± 0.10   | 0.87 ± 0.07 <sup>a</sup>    |
| Total area (mm <sup>2</sup> )              | 2.10 ± 0.08 <sup>c</sup>   | 2.20 ± 0.09 <sup>d</sup>   | 2.30 ± 0.14   | 2.33 ± 0.14 <sup>b</sup>    |

Each femur was subjected to micro-CT at cortical ROI— mid-diaphysis. With each bone, ten cortical parameters were assessed. Values are means and standard deviation. Statistical significance was determined by ANOVA followed by paired group comparisons ( $p < 0.05$ ). “a” and “b” are placed on the HFWD+AQ group; “a” shows statistically significant difference relative to the HFWD group, “b” shows statistically significant difference relative to AIN76A; “c” is placed on the AIN76A shows significant difference relative to the HFWD and “d” is placed on the AIN76A+AQ shows significant difference relative to AIN76A. Data are based on 10 male mice in each diet group at 5 and 12 months while 15 mice at 18 months.
