# Supplementary material for: Bone structure and function in male C57BL/6 mice: Effects of a high-fat Western-style diet with or without trace minerals
Source: PubMed Central journal article supplement — Bone Rep. 2016 May 13;5:141–9. doi: 10.1016/j.bonr.2016.05.002 (PMC4920365; doi:10.1016/j.bonr.2016.05.002), 2016-05-13
Supplement: NIHMS793176-supplement-7.pdf [file NIHMS793176-supplement-7.pdf]

**Supplement Table 6.** Micro-CT analysis of cortical and trabecular regions of Caudal 8 vertebrae at 18 month.

|                                                             | Zero Time     | HFWD          | HFWD + AQ                  |
|-------------------------------------------------------------|---------------|---------------|----------------------------|
| <b><u>Cortical</u></b>                                      |               |               |                            |
| Bone mineral content (mg)                                   | 0.06 ± 0.00   | 0.22 ± 0.03   | 0.29 ± 0.03 <sup>a</sup>   |
| Bone mineral density (mg/cc)                                | 383 ± 24      | 654 ± 47      | 775 ± 35 <sup>a</sup>      |
| Tissue mineral content (mg)                                 | 0.04 ± 0.00   | 0.18 ± 0.03   | 0.27 ± 0.03 <sup>a</sup>   |
| Tissue mineral density (mg/cc)                              | 635 ± 16      | 833 ± 51      | 872 ± 46                   |
| Inner perimeter (mm)                                        | 3.20 ± 0.27   | 3.23 ± 0.25   | 3.02 ± 0.17 <sup>a</sup>   |
| Outer perimeter (mm)                                        | 3.65 ± 0.23   | 4.81 ± 0.24   | 4.95 ± 0.24                |
| Marrow area (mm <sup>2</sup> )                              | 0.69 ± 0.11   | 0.66 ± 0.10   | 0.57 ± 0.06 <sup>a</sup>   |
| Cortical area (mm <sup>2</sup> )                            | 0.19 ± 0.01   | 0.52 ± 0.03   | 0.70 ± 0.05 <sup>a</sup>   |
| Total area (mm <sup>2</sup> )                               | 0.88 ± 0.10   | 1.18 ± 0.10   | 1.28 ± 0.09 <sup>a</sup>   |
| Volume (mm <sup>3</sup> )                                   | 0.17 ± 0.01   | 0.33 ± 0.02   | 0.38 ± 0.03 <sup>a</sup>   |
| Volume of bone (mm <sup>3</sup> )                           | 0.06 ± 0.01   | 0.22 ± 0.02   | 0.31 ± 0.02 <sup>a</sup>   |
| <b><u>Trabecular</u></b>                                    |               |               |                            |
| Bone mineral content (mg)                                   | 0.08 ± 0.01   | 0.30 ± 0.03   | 0.34 ± 0.04 <sup>a</sup>   |
| Bone mineral density (mg/cc)                                | 225 ± 6       | 509 ± 45      | 551 ± 31 <sup>a</sup>      |
| Tissue mineral content (mg)                                 | 0.04 ± 0.01   | 0.25 ± 0.03   | 0.31 ± 0.04 <sup>a</sup>   |
| Tissue mineral density (mg/cc)                              | 448 ± 4       | 687 ± 31      | 651 ± 13 <sup>a</sup>      |
| Bone volume fraction (mm <sup>3</sup> /mm <sup>3</sup> )    | 0.27 ± 0.01   | 0.63 ± 0.06   | 0.76 ± 0.05 <sup>a</sup>   |
| Surface to volume ratio (mm <sup>2</sup> /mm <sup>3</sup> ) | 58.2 ± 2.9    | 19.1 ± 3.2    | 18.6 ± 2.8                 |
| Trabecular thickness (mm)                                   | 0.034 ± 0.002 | 0.103 ± 0.019 | 0.110 ± 0.017              |
| Trabecular number (1/mm)                                    | 7.7 ± 0.1     | 6.1 ± 0.6     | 7.0 ± 0.6 <sup>a</sup>     |
| Trabecular spacing (mm)                                     | 0.095 ± 0.003 | 0.062 ± 0.009 | 0.035 ± 0.005 <sup>a</sup> |
| Volume (mm <sup>3</sup> )                                   | 0.34 ± 0.03   | 0.59 ± 0.06   | 0.62 ± 0.05                |
| Volume of bone (mm <sup>3</sup> )                           | 0.09 ± 0.01   | 0.36 ± 0.04   | 0.47 ± 0.06 <sup>a</sup>   |

Each Caudal 8 vertebra (from a subset) was subjected to micro-CT at two ROIs—cortical (middle isosurface) and trabecular (cranial isosurface). With each vertebra, eleven cortical and trabecular parameters were assessed. Values are means and standard deviation. Statistical significance was determined by paired group comparisons ( $p < 0.05$ ). “a” is placed on the HFWD+AQ group: “a” shows statistically significant improvement relative to the HFWD group. Vertebral data are based on 10 male mice each of the two high-fat diets at 18 months. Zero time mice ( $n=5$ ) were 4 weeks old.
