# Supplementary material for: Bone structure and function in male C57BL/6 mice: Effects of a high-fat Western-style diet with or without trace minerals
Source: PubMed Central journal article supplement — Bone Rep. 2016 May 13;5:141–9. doi: 10.1016/j.bonr.2016.05.002 (PMC4920365; doi:10.1016/j.bonr.2016.05.002), 2016-05-13
Supplement: NIHMS793176-supplement-8.pdf [file NIHMS793176-supplement-8.pdf]

**Supplement Table 7.** Biomechanical properties of Caudal 8 vertebrae at 18 month.

---

|                         | Zero Time   | HFWD        | HFWD+AQ               |
|-------------------------|-------------|-------------|-----------------------|
| Stiffness (N/mm)        | 37 ± 11     | 215 ± 85    | 320 ± 80 <sup>a</sup> |
| Max load (N)            | 9 ± 2       | 54 ± 17     | 76 ± 8 <sup>a</sup>   |
| Displacement ratio (mm) | 0.56 ± 0.22 | 0.25 ± 0.13 | 0.31 ± 0.17           |
| Total Work Ideal (Nmm)  | 5 ± 1       | 20 ± 4      | 34 ± 13 <sup>a</sup>  |

---

Each Caudal 8 vertebra was subjected to biomechanical testing. With each vertebra, 4 parameters were assessed. Values are means and standard deviation. Statistical significance was determined by paired group comparisons ( $p < 0.05$ ). “a” is placed on the HFWD+AQ group which shows statistically significant difference relative to the HFWD group. Vertebral data are based on 10 male mice in both diet groups at 18 months. Zero time mice ( $n=5$ ) were 4 weeks old.
