# Supplementary material for: Bone structure and function in male C57BL/6 mice: Effects of a high-fat Western-style diet with or without trace minerals
Source: PubMed Central journal article supplement — Bone Rep. 2016 May 13;5:141–9. doi: 10.1016/j.bonr.2016.05.002 (PMC4920365; doi:10.1016/j.bonr.2016.05.002), 2016-05-13
Supplement: NIHMS793176-supplement-9.pdf [file NIHMS793176-supplement-9.pdf]

**Supplement Table 8. Bone Mineral Analysis at 5 months ( $\mu\text{g/g}$ )**

**Male**

| <b>Mineral / Diet Group</b> | <b>AIN 76A</b> | <b>AIN 76A+<br/>AQ</b> | <b>HFWD</b> | <b>HFWD+<br/>AQ</b> |
|-----------------------------|----------------|------------------------|-------------|---------------------|
| <b>Fluoride</b>             | 1.09           | 0.91                   | 1.15        | 0.79                |
| <b>Barium</b>               | 4.36           | 5.9                    | 7.72        | 4.16                |
| <b>Boron</b>                | <0.5           | <0.5                   | <0.5        | <0.5                |
| <b>Calcium</b>              | 199500         | 199400                 | 193100      | 209300              |
| <b>Copper</b>               | <0.5           | <0.5                   | <0.5        | <0.5                |
| <b>Iron</b>                 | 144            | 69                     | 380         | 134                 |
| <b>Lanthanum</b>            | 1.24           | 1.13                   | 1.26        | 0.88                |
| <b>Magnesium</b>            | 3036           | 3250                   | 2927        | 3208                |
| <b>Manganese</b>            | 2              | 1.97                   | 7.2         | 1.63                |
| <b>Phosphorus</b>           | 95403          | 95565                  | 90000       | 98306               |
| <b>Potassium</b>            | 759            | 724                    | 758         | 903                 |
| <b>Selenium</b>             | <0.5           | <0.5                   | <0.5        | <0.5                |
| <b>Silicon</b>              | 4.75           | <0.5                   | 4.34        | <0.5                |
| <b>Strontium</b>            | 50.2           | 210                    | 112         | 231                 |
| <b>Zinc</b>                 | 111            | 124                    | 246         | 140                 |

The long bones (one femur and tibia from each animal in the group) were “pooled” and analyzed for levels of trace metals found in the multi-mineral-rich product to give a single value at each time point. Some of these elements were recorded below detectable levels when their concentration level found below  $0.5\mu\text{g/g}$ . The levels of individual trace elements were determined by Inductively Coupled Plasma Optical Emission Spectrometry (ICP-OES) except Flouride which was done by AOAC 984.37 assay.
