# Supplementary material for: Bone structure and function in male C57BL/6 mice: Effects of a high-fat Western-style diet with or without trace minerals
Source: PubMed Central journal article supplement — Bone Rep. 2016 May 13;5:141–9. doi: 10.1016/j.bonr.2016.05.002 (PMC4920365; doi:10.1016/j.bonr.2016.05.002), 2016-05-13
Supplement: NIHMS793176-supplement-10.pdf [file NIHMS793176-supplement-10.pdf]

**Supplement Table 9. Bone Mineral Analysis at 12 months (µg/g)**

| Mineral / Diet Group | <u>Male</u> |                |        |             |
|----------------------|-------------|----------------|--------|-------------|
|                      | AIN 76A     | AIN 76A+<br>AQ | HFWD   | HFWD+<br>AQ |
| Fluoride             | 7.58        | 4.92           | 7.19   | 6.72        |
| Aluminum             | 1.38        | 2.84           | 3.89   | 1.72        |
| Antimony             | <0.5        | <0.5           | <0.5   | <0.5        |
| Arsenic              | <0.5        | <0.5           | <0.5   | <0.5        |
| Barium               | 3.69        | 4.92           | 6.4    | 3.49        |
| Beryllium            | <0.5        | <0.5           | <0.5   | <0.5        |
| Bismuth              | <0.5        | <0.5           | <0.5   | <0.5        |
| Boron                | <0.5        | <0.5           | <0.5   | <0.5        |
| Calcium              | 230,300     | 233800         | 215800 | 243800      |
| Cadmium              | <0.5        | <0.5           | <0.5   | <0.5        |
| Chromium             | <0.5        | <0.5           | 0.69   | <0.5        |
| Cobalt               | <0.5        | <0.5           | <0.5   | <0.5        |
| Copper               | <0.5        | <0.5           | <0.5   | <0.5        |
| Iron                 | 266         | 218            | 331    | 201         |
| Lanthanum            | 0.66        | 0.55           | 0.79   | <0.5        |
| Lead                 | <0.5        | <0.5           | <0.5   | <0.5        |
| Lithium              | 0.64        | 0.65           | 0.66   | 0.52        |
| Magnesium            | 3192        | 3724           | 3175   | 3537        |
| Manganese            | 1.22        | 1.27           | 4.44   | 1.36        |
| Mercury              | <0.5        | <0.5           | <0.5   | <0.5        |
| Molybdenum           | <0.5        | <0.5           | <0.5   | <0.5        |
| Nickel               | 0.56        | <0.5           | <0.5   | <0.5        |
| Niobium              | <0.5        | <0.5           | <0.5   | <0.5        |
| Phosphorus           | 115,300     | 117800         | 112800 | 121900      |
| Potassium            | 1273        | 1109           | 1172   | 1123        |
| Selenium             | <0.5        | <0.5           | <0.5   | <0.5        |
| Silicon              | 1.2         | <0.5           | 2.4    | <0.5        |
| Silver               | <0.5        | <0.5           | <0.5   | <0.5        |
| Sodium               | 12400       | 12740          | 11620  | 12990       |
| Strontium            | 25          | 260            | 66     | 244         |
| Sulfur               | 3423        | 3348           | 3133   | 3375        |
| Tellurium            | <0.5        | <0.5           | <0.5   | <0.5        |
| Thallium             | <0.5        | <0.5           | <0.5   | <0.5        |
| Thorium              | <0.5        | <0.5           | <0.5   | <0.5        |
| Tin                  | <0.5        | <0.5           | <0.5   | <0.5        |
| Titanium             | <0.5        | <0.5           | <0.5   | <0.5        |
| Tungsten             | <0.5        | <0.5           | <0.5   | <0.5        |
| Vanadium             | <0.5        | <0.5           | 1.23   | <0.5        |
| Yttrium              | <0.5        | <0.5           | <0.5   | <0.5        |
| Zinc                 | 134         | 150            | 232    | 164         |
| Zirconium            | <0.5        | <0.5           | <0.5   | <0.5        |

The long bones (one femur and tibia from each animal in the group) were “pooled” and analyzed for levels of trace metals found in the multi-mineral-rich product to give a single value at each time point. Some of these elements were recorded below detectable levels when their concentration level found below 0.5 $\mu$ g/g. The levels of individual trace elements were determined by Inductively Coupled Plasma Optical Emission Spectrometry (ICP-OES) except Flouride which was done by AOAC 984.37 assay.
