# Supplementary material for: Bone structure and function in male C57BL/6 mice: Effects of a high-fat Western-style diet with or without trace minerals
Source: PubMed Central journal article supplement — Bone Rep. 2016 May 13;5:141–9. doi: 10.1016/j.bonr.2016.05.002 (PMC4920365; doi:10.1016/j.bonr.2016.05.002), 2016-05-13
Supplement: NIHMS793176-supplement-11.pdf [file NIHMS793176-supplement-11.pdf]

Supplement Table 10.

Bone Mineral Analysis at 18 months ( $\mu\text{g/g}$ )

| Mineral / Diet group | <u>Male</u> |                |        |             |
|----------------------|-------------|----------------|--------|-------------|
|                      | AIN 76A     | AIN 76A+<br>AQ | HFWD   | HFWD+<br>AQ |
| Fluoride             | 7.2         | 7.53           | 6.13   | 7.04        |
| Aluminum             | <0.5        | <0.5           | <0.5   | <0.5        |
| Antimony             | <0.5        | <0.5           | <0.5   | <0.5        |
| Arsenic              | <0.5        | <0.5           | <0.5   | <0.5        |
| Barium               | 3.07        | 4.07           | 5.21   | 2.76        |
| Beryllium            | <0.5        | <0.5           | <0.5   | <0.5        |
| Bismuth              | <0.5        | <0.5           | <0.5   | <0.5        |
| Boron                | <0.5        | <0.5           | <0.5   | <0.5        |
| Calcium              | 229,100     | 234100         | 204800 | 218600      |
| Cadmium              | <0.5        | <0.5           | <0.5   | <0.5        |
| Chromium             | <0.5        | <0.5           | <0.5   | <0.5        |
| Cobalt               | <0.5        | <0.5           | <0.5   | <0.5        |
| Copper               | <0.5        | <0.5           | <0.5   | <0.5        |
| Iron                 | 228         | 167            | 327    | 224         |
| Lanthanum            | <0.5        | <0.5           | <0.5   | <0.5        |
| Lead                 | 0.98        | 1.05           | 0.62   | 0.65        |
| Lithium              | 2.67        | 1.52           | 1.16   | 0.84        |
| Magnesium            | 3649        | 3797           | 3243   | 3770        |
| Manganese            | 1.16        | 0.97           | 3.56   | 1.07        |
| Mercury              | <0.5        | <0.5           | <0.5   | <0.5        |
| Molybdenum           | <0.5        | <0.5           | <0.5   | <0.5        |
| Nickel               | <0.5        | <0.5           | <0.5   | <0.5        |
| Niobium              | <0.5        | <0.5           | <0.5   | <0.5        |
| Phosphorus           | 108,300     | 113200         | 100700 | 107000      |
| Potassium            | 1458        | 1227           | 1306   | 1245        |
| Selenium             | <0.5        | <0.5           | <0.5   | <0.5        |
| Silicon              | 1.76        | 0.81           | 1.78   | <0.5        |
| Silver               | <0.5        | <0.5           | <0.5   | <0.5        |
| Sodium               | 17180       | 15280          | 14690  | 14970       |
| Strontium            | 25          | 237            | 44     | 238         |
| Sulfur               | 3164        | 3025           | 3202   | 3151        |
| Tellurium            | <0.5        | <0.5           | <0.5   | <0.5        |
| Thallium             | <0.5        | <0.5           | <0.5   | <0.5        |
| Thorium              | <0.5        | <0.5           | <0.5   | <0.5        |
| Tin                  | <0.5        | <0.5           | <0.5   | <0.5        |
| Titanium             | <0.5        | <0.5           | <0.5   | <0.5        |
| Tungsten             | <0.5        | <0.5           | <0.5   | <0.5        |
| Vanadium             | <0.5        | <0.5           | <0.5   | <0.5        |
| Yttrium              | <0.5        | <0.5           | <0.5   | <0.5        |
| Zinc                 | 124         | 138            | 198    | 147         |
| Zirconium            | <0.5        | <0.5           | <0.5   | <0.5        |

The long bones (one femur and tibia from each animal in the group) were “pooled” and analyzed for levels of trace metals found in the multi-mineral-rich product to give a single value at each time point. Some of these elements were recorded below detectable levels when their concentration level found below 0.5µg/g. The levels of individual trace elements were determined by Inductively Coupled Plasma Optical Emission Spectrometry (ICP-OES) except Flouride which was done by AOAC 984.37 assay.
