# Supplementary material for: Bone structure and function in male C57BL/6 mice: Effects of a high-fat Western-style diet with or without trace minerals
Source: PubMed Central journal article supplement — Bone Rep. 2016 May 13;5:141–9. doi: 10.1016/j.bonr.2016.05.002 (PMC4920365; doi:10.1016/j.bonr.2016.05.002), 2016-05-13
Supplement: NIHMS793176-supplement-12.pdf [file NIHMS793176-supplement-12.pdf]

**Supplement Table 11. Bone Mineral Analysis at 18 months in C8 vertebrae of male mice ( $\mu\text{g/g}$ )**

| <b>Mineral / Diet group</b> | <b>Zero Time</b> | <b>HFWD</b> | <b>HFWD+ AQ</b> |
|-----------------------------|------------------|-------------|-----------------|
| <b>Barium</b>               | <0.5             | <0.5        | <0.5            |
| <b>Calcium</b>              | 97610            | 145700      | 159600          |
| <b>Copper</b>               | 71.2             | 18.4        | 6.03            |
| <b>Gadolinium</b>           | 0.401            | 0.001       | 0.002           |
| <b>Iron</b>                 | 25.1             | 23          | 11.2            |
| <b>Lanthanum</b>            | <0.5             | <0.5        | <0.5            |
| <b>Magnesium</b>            | 1843             | 1923        | 2500            |
| <b>Manganese</b>            | <0.5             | <0.5        | <0.5            |
| <b>Phosphorus</b>           | 52910            | 64910       | 74470           |
| <b>Potassium</b>            | 3378             | 1141        | 1477            |
| <b>Silicon</b>              | 73               | 17.2        | 52.9            |
| <b>Strontium</b>            | 12.5             | 40.9        | 254             |
| <b>Sulfur</b>               | 3126             | 1832        | 1868            |
| <b>Zinc</b>                 | 306              | 235         | 169             |

The caudal 8 vertebrae (from each animal in the group) were “pooled” and analyzed for levels of trace metals found in the multi-mineral-rich product to give a single value at each time point. Some of these elements were recorded below detectable levels when their concentration level found below  $0.5\mu\text{g/g}$ . The levels of individual trace elements were determined by Inductively Coupled Plasma Optical Emission Spectrometry (ICP-OES) assay.
